# Supplementary material for: Vestibular-evoked myogenic potential triggered by galvanic vestibular stimulation may reveal subclinical alterations in human T-cell lymphotropic virus type 1-associated myelopathy
Source: PLOS journal article supplement (doi:10.1371/journal.pone.0200536), 2018-07-12
Supplement: S2 (10.1371/journal.pone.0200536.s002) [file journal.pone.0200536.s002]

**S2 Table.** Clinical aspects of the human T-cell lymphotropic virus type 1 (HTLV-1) infected (n=77) and -uninfected individuals (n=45)

| <b>Variables</b>        | <b>G1</b>     | <b>G2</b>      | <b>G3</b>      | <b>G4</b>      |
|-------------------------|---------------|----------------|----------------|----------------|
|                         | <b>(n=45)</b> | <b>(n= 26)</b> | <b>(n= 26)</b> | <b>(n= 25)</b> |
| <b>Dry eye</b>          | 5 [11]        | 4 [15]         | 6 [23]         | 14 [56]        |
| <b>Constipation</b>     | 3 [6]         | 5 [19]         | 9 [35]         | 19 [76]        |
| <b>Back pain</b>        | 4 [9]         | 4 [15]         | 6 [23]         | 17 [68]        |
| <b>Urinary symptoms</b> | 0             | 0              | 4 [15]         | 19 [76]        |
| <b>Sensory symptoms</b> | 0             | 0              | 9 [35]         | 12 [48]        |
| <b>Babinski sign</b>    | 0             | 0              | 7 [27]         | 17 [68]        |
| <b>Reduced strength</b> | 0             | 0              | 3 [12]         | 14 [56]        |
| <b>Gait disturbance</b> | 0             | 0              | 14 [54]        | 25 [100]       |
| <b>EDSS</b>             | 0             | 0              | 2 (1/2)        | 6 (5/7)        |
| <b>OMDS</b>             | 0             | 0              | 1 (0/1)        | 5 (4/5)        |

G1, uninfected control group; G2, HTLV-1-asymptomatic group; G3, possible HTLV-1-associated myelopathy (HAM) group; G4, HAM group; n, number of participants; EDSS, Expanded Disability Status Scale; OMDS, Osame's Motor Disability Score; Data are expressed as median (Quartil Q1/Quartil Q3) for continuous variables with non-normal distribution, and as absolute number [percentage] for categorical variables.
