# Supplementary material for: Vestibular-evoked myogenic potential triggered by galvanic vestibular stimulation may reveal subclinical alterations in human T-cell lymphotropic virus type 1-associated myelopathy
Source: PLOS journal article supplement (doi:10.1371/journal.pone.0200536), 2018-07-12
Supplement: S3 (10.1371/journal.pone.0200536.s003) [file journal.pone.0200536.s003]

**S3 Table. Comparison between the VEMP recorded from the lower limb muscle and the VEMP recorded from the cervical muscle in individuals with possible HAM (n=17) and with definite HAM (n=18).**

| <b>Group</b>                        | <b>Response</b>        | <b>VEMP recorded<br/>from the lower<br/>limb muscle</b> | <b>VEMP recorded<br/>from the cervical<br/>muscle</b> |
|-------------------------------------|------------------------|---------------------------------------------------------|-------------------------------------------------------|
| <b>G3 - Possible HAM<br/>(n=17)</b> | <b>Normal</b>          | 6 (35)                                                  | 13 (76)                                               |
|                                     | <b>Delayed latency</b> | 10 (59)                                                 | 4 (24)                                                |
|                                     | <b>Absent</b>          | 1 (6)                                                   | 0                                                     |
| <b>G4 – Definite HAM<br/>(n=18)</b> | <b>Normal</b>          | 0                                                       | 10 (55)                                               |
|                                     | <b>Delayed latency</b> | 7 (39)                                                  | 5 (28)                                                |
|                                     | <b>Absent</b>          | 11 (61)                                                 | 3 (17)                                                |

Data are expressed as absolute number (percentage); n, number of participants with performed both VEMP recorded from the lower limb muscle and VEMP recorded from the cervical muscle.
